# Supplementary material for: Estimating causal effects of time-dependent exposures on a binary endpoint in a high-dimensional setting
Source: Springer Nature journal article supplement (doi:10.1186/s12874-018-0527-5), 2018-07-03
Supplement: MOESM2 [file 15904174]

## Simulation set-up

In this additional file, we explain how we run our simulations and what scenarios we tested. In our scenarios, we fixed the number of variables, of maximum parent per node and the correlation between biomarkers. We tested different value for the number of observations, the number of measurement (visits) and for the independence test cut-off alpha leading to a total of 8 scenarios.

## Scenarios

We generated data faithful to a by using the following parametrisations:

- $p = 20$
- $n_{visits} \in \{4, 6\}$
- $maxP = 3$
- $n \in \{50, 1000\}$
- $\alpha \in \{0.02, 0.2\}$
- $\rho_{min} = 0.5, \rho_{max} = 0.7$
- $\sigma = 1$

For each scenario we generated a DAG with  $p * n_{visits} + Y$  variables and then sampled 500 different datasets per DAG. We calculated the average SHD, sensibility and specificity for estimated CPDAGs with both CP-stable and COPC-stable based on the 500 datasets.

## Generate a DAG with repeated measures of covariates

To generate a DAG that has repeated measures and an expected number of parents per node  $maxP$ , we used the following approach: first, we generated a  $(p \times n_{visits} + Y) \times (p \times n_{visits} + Y)$  weighted matrix  $wM$ , where  $p$  is the number of biomarkers,  $n_{visits}$  the number of visits (measurements) and  $Y$  the outcome; with independent realizations of  $Uniform(0.5, 1)$  in the upper triangle of the matrix and zeroes in the remaining entries. At the end, if  $wM_{i,j} > 0$  then, it meant there was an arrow from  $X_i$  to  $X_j$  ( $X_i \rightarrow X_j$ ) with a weight of  $wM_{i,j}$ . The maximum parent for each node was limited by  $maxP$ . Then, based on the true DAG obtained, we generated i.i.d samples using algorithm 1.

---

**Algorithm 1:** Generation of data based on a DAG with repeated measures of covariates with a single outcome

---

**Input:** number of observations ( $n$ ), weighted matrix ( $wM$ ), sigma ( $\sigma$ ),  $\rho_{min}$ ,  $\rho_{max}$ , number of biomarkers ( $p$ ), number of measurements ( $n_{visits}$ )

**for** Subject  $i \leftarrow 1$  **to**  $n$  **do**

**for** Number of Biomarkers  $j \leftarrow 1$  **to**  $p$  **do**

Let  $V_j$  be the set of measurements for the biomarker  $j$

Let the vector  $\mu_{V_j} = E(V_1) = E(V_2) = \dots = E(V_{n_{visits}}) = 0$

$\rho_j \sim Uniform(\rho_{min}, \rho_{max})$

$$\Sigma_j = \begin{pmatrix} \sigma^2 & \rho^1 \sigma^2 & \rho^2 \sigma^2 & \dots & \rho^{n_{visits}} \sigma^2 \\ \rho^1 \sigma^2 & \sigma^2 & \rho^1 \sigma^2 & \dots & \rho^{n_{visits}-1} \sigma^2 \\ \rho^2 \sigma^2 & \rho^1 \sigma^2 & \sigma^2 & \dots & \rho^{n_{visits}-2} \sigma^2 \\ \vdots & \vdots & \vdots & \ddots & \vdots \\ \rho^{n_{visits}} \sigma^2 & \rho^{n_{visits}-1} \sigma^2 & \rho^{n_{visits}-2} \sigma^2 & \dots & \sigma^2 \end{pmatrix} \epsilon_{i,V_j} \sim N_{n_{visits}}(\mu_j, \Sigma_j)$$

$\epsilon_{i,Outcome} \sim N(0, 1)$

**end**

**end**

$p_{tot} = p \times n_{visits} + 1$  (outcome)

**for** Subject  $i \leftarrow 1$  **to**  $n$  **do**

**for** Variable  $v \leftarrow 1$  **to**  $p_{tot}$  **do**

**if**  $Variable_v$  has no parent **then**

|  $Variable_{i,v} = \epsilon_{Variable_{i,v}}$

**end**

**else if**  $Variable_v$  has at least 1 parent **then**

|  $Variable_{i,v} = \sum_{j=1}^{n_{parents}} (wM_{j,v} \times PA_j(Variable_{i,v})) + \epsilon_{Variable_{i,v}}$

**if**  $v = p$  **then**

|  $Variable_{i,p} \sim Bernoulli(\text{logit}^{-1}(Variable_{i,p_{tot}}))$

**end**

**end**

**end**

**end**

**Output:** Simulated database

---
