# Supplementary material for: Estimating causal effects of time-dependent exposures on a binary endpoint in a high-dimensional setting
Source: BMC Med Res Methodol. 2018 Jul 3;18:67. doi: 10.1186/s12874-018-0527-5 (PMC6029422; doi:10.1186/s12874-018-0527-5)
Supplement: Supplementary file 1 — Estimation of causal effect. It details the formulas used for the calculation of causal effects. (DOCX 26 kb) [file 12874_2018_527_MOESM1_ESM.docx]

**Estimation of the causal effect of a repeated biomarker on a binary outcome**

Causal effects of on the outcome can be quantified by measuring the difference of any function of the distribution of “counterfactuals outcome” such as mean, median or ratios (see technical point 1.1 of [1]). Let *G* be a directed acyclic graph with V the set of nodes described by variables.

Pearl [2] showed that the distribution generated from a DAG is called Markovian and can be factorized as

Intervention on a variable using Pearl’s do operator assigns a value to the variable over the population; and the distribution generated on the variables set can be expressed in the *truncated factorization formula*:

Equation (2) reflects the removal in (3) of since has no effect on. Graphically, removing is equivalent to removing the arrows from to.

Based on (2), Pearl’s has shown that the effect of the intervention on Y is given by

Equation (3) means conditioning on the parents of and then averaging the results weighted by the probability of .

For a continuous outcome, , which denotes the mean of when is uniformly assigned to over the population. So we can defined the average causal effect for a continuous outcome *Y* by

where and denote the mean of when is uniformly assigned to or over the population via Pearl’s *do* operator. In the case of continuous Gaussian variables, the causal effect of on *Y* is the regression coefficient of in the linear regression of *Y* on and *pa*(*Xi,G*) [1, 2]:

However, in the case where covariates are Gaussian and the outcome Y is binary, the linearity stated in (5) does not hold. This is why we modelled the relation using a logit link that allows keeping the linearity and calculating the causal effect for a binary outcome as

This method of modelling is widely used in [1] (see technical point 11.1).

However, the “separation” phenomenon [3] could occur in small datasets in logistic regression such as in our melanoma example: subjects having and subjects having can be separated by a single or a combination of covariates, the likelihood converges while at least one parameter estimate diverges to, leading to infinite odds ratio estimates. To overcome this situation, Firth proposed to reduce the bias of maximum likelihood estimates [4]. Several studies have shown that this method provides unbiased estimates [5, 6]. In our small observational dataset setting, the causal effects on dichotomous outcome will be estimated through logistic regression with Firth correction.

1. Hernan MA, Robins JM: *Causal Inference*. Boca Raton: Chapman & Hall/CRC; 2016.

2. Pearl J: *Causality: Models, Reasoning, and Inference*. 2nd ed. Cambridge university press; 2009.

3. Albert A, Anderson JA: **On the existence of maximum likelihood estimates in logistic regression models**. *Biometrika* 1984, **71**:1–10.

4. Firth D: **Bias Reduction of Maximum Likelihood Estimates**. *Biometrika* 1993, **80**:27–38.

5. Heinze G, Schemper M: **A solution to the problem of separation in logistic regression**. *Stat Med* 2002, **21**:2409–2419.

6. Heinze G: **A comparative investigation of methods for logistic regression with separated or nearly separated data**. *Stat Med* 2006, **25**:4216–4226.
